# Supplementary material for: Epidemiological and Clinical Features of Mpox during the Clade Ib Outbreak in South-Kivu, Democratic Republic of the Congo: a Prospective Cohort Study
Source: medRxiv preprint, doi:10.1101/2024.11.18.24316975, version 1 (2024-11-18)
Supplement: Supplemental Figure 1 [file 316975_file05.docx]

**Supplementary figure 1. Flowchart participants**
